# Supplementary material for: Cytotoxicity of phosphoramidate, bis-amidate and cycloSal prodrug metabolites against tumour and normal cells
Source: Royal Society of Chemistry journal article supplement (doi:10.1039/d4md00115j), 2024-01-01
Supplement: d4md00115j1.pdf [file d4md00115j1.pdf]

## Supplementary Information

### **Cytotoxicity of Phosphoramidate, Bis-amidate and CycloSal Prodrug Metabolites Against Tumour and Normal Cells**

Rebecca E. Farrell<sup>a</sup>, Harrison Steele<sup>a</sup>, Ryan J. Middleton<sup>b</sup>, Danielle Skropeta<sup>a\*</sup>, Guo-Jun Liu<sup>b,c\*</sup>.

<sup>a</sup> School of Chemistry & Molecular Bioscience and Molecular Horizons, Faculty of Science, Medicine and Health, University of Wollongong, Wollongong, NSW 2522, Australia.

<sup>b</sup> Australian Nuclear Science and Technology Organisation, Lucas Heights, NSW 2234, Australia.

<sup>c</sup> Discipline of Medical Imaging Sciences, Brain and Mind Centre, Faculty of Medicine and Health, The University of Sydney, Sydney, NSW 2050, Australia

\* Corresponding authors: Danielle Skropeta (skropeta@uow.edu.au) and Guo-Jun Liu (gdl@ansto.gov.au)

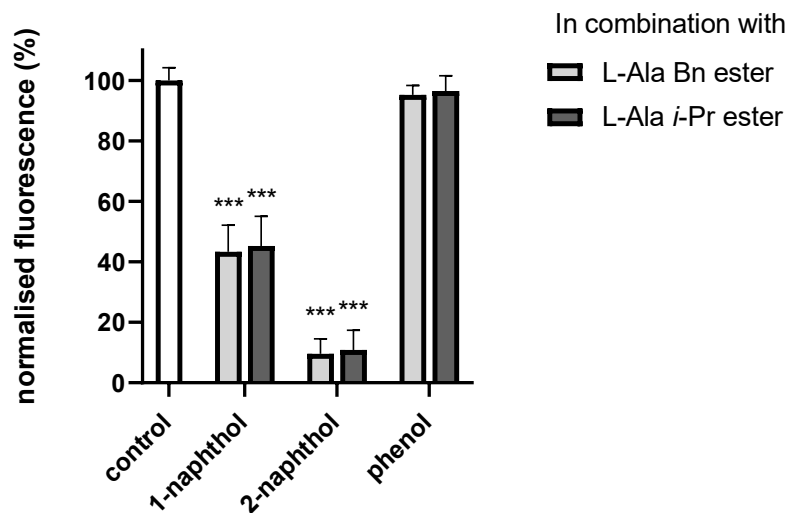

**Figure S1:** Viability of BxPC3 cells treated with the combined L-alanine ester and aryl alcohol moieties of phosphoramidate prodrugs. Cells were treated with 128  $\mu$ M of the aryl alcohol and L-alanine ester for 72 hours. Cell viability was then measured by CyQUANT assay, and the plate was imaged using the Amersham™ Typhoon 5™ laser scanning imaging platform with a Cy2 emission filter (Ex: 488 nm and Em: 520 nm) and a pixel resolution of 100  $\mu$ m. Statistical significance is relative to the control. \*\*\*  $p \leq 0.001$ . Data is shown as mean  $\pm$  S.D of three independent experiments with four replicates per condition.

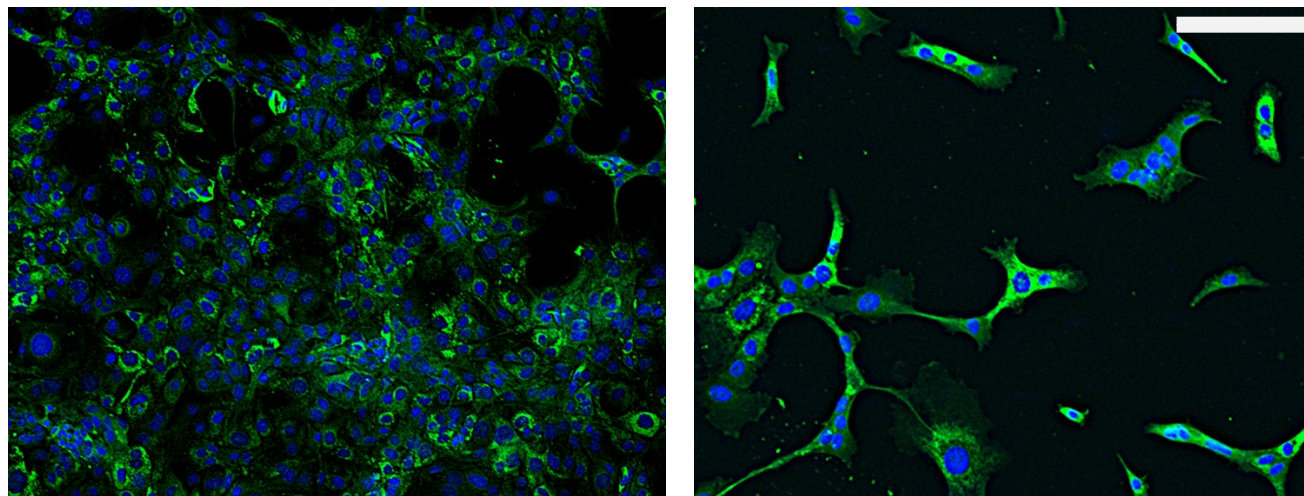

**Figure S2:** Purity of primary cultured mouse astrocytes confirmed by immunohistochemistry. The astrocytes were stained with rabbit anti-mouse antibody and then revealed with AF488 conjugated goat anti-rabbit secondary antibody. The images are from different fields of the cover slip with different cell density. The green represents the positive staining of GFAP while the nuclei are stained with DAPI. The white bar represents 50  $\mu$ m. The purity of the astrocytes is greater than 90%, checked under BX61WI microscope equipped with CoolSNAP HQ<sup>2</sup> camera and images were analysed with CellSense Dimension software.
